# Supplementary material for: Mapping phosphoproteins in Mycoplasma genitalium and Mycoplasma pneumoniae
Source: PubMed Central journal article supplement (PMC1947986; doi:10.1186/1471-2180-7-63), 2007-07-02
Supplement: 1471-2180-7-63-S1.pdf [file 1471-2180-7-63-S1.pdf]

## Summary of potentially phosphorylated peptides

**Table A. Predicted phosphopeptides in *M. genitalium* based on MALDI-MS masses**

| Protein name<br>(Locus tag)                                        | Peptide<br>sequence<br>Start- End | Observed<br>$m/z^1$ | $M_r$ (expt) <sup>1</sup> | $M_r$ (calc) <sup>1</sup> | Delta mass<br>(Da) <sup>1</sup> | Modification <sup>2</sup>        | Missed<br>cleavages | Phosphopeptide sequence <sup>3</sup>                                                                |
|--------------------------------------------------------------------|-----------------------------------|---------------------|---------------------------|---------------------------|---------------------------------|----------------------------------|---------------------|-----------------------------------------------------------------------------------------------------|
| Putative structural protein<br>involved in cytoskeleton<br>(MG328) | 740-748                           | 1215.63             | 1214.62                   | 1214.54                   | 0.08                            | 1 Phospho (Y)                    | 1                   | ERIQAY <u>Y</u> AER                                                                                 |
| Heat shock protein <i>dnaJ</i><br>homolog MG200<br>(MG200)         | 445-458                           | 1484.71             | 1483.71                   | 1483.60                   | 0.11                            | 1 Phospho<br>(STYHCD)            | 1                   | GFGND <u>H</u> GKGC <u>G</u> DLK                                                                    |
|                                                                    | 506-525                           | 2284.18             | 2283.18                   | 2283.17                   | 0.01                            | 1 Phospho<br>(STYHCD)            | 2                   | VDGEID <u>I</u> NAIMKFEKLGIAK                                                                       |
| P65 protein<br>(MG217)                                             | 282-287                           | 856.53              | 885.52                    | 885.40                    | 0.12                            | 1 Phospho (ST)                   | 1                   | MQKL <u>T</u> R                                                                                     |
| Conserved hypothetical protein<br>(MG218.1)                        | 29-53                             | 2808.30             | 2807.30                   | 2807.40                   | -0.09                           | 1 Phospho (ST)                   | 1                   | QLNELKQILV <u>S</u> LDNQEAS <u>A</u> TAV <u>T</u> DK                                                |
|                                                                    | 35-54                             | 2211.10             | 2210.09                   | 2210.08                   | 0.01                            | 1 Phospho (ST)                   | 1                   | QILV <u>S</u> LDNQEAS <u>A</u> TAV <u>T</u> DKK                                                     |
| Transcription elongation factor<br><i>greA</i> homolog<br>(MG282)  | 104-122                           | 2239.14             | 2238.13                   | 2238.02                   | 0.11                            | 1 Phospho (Y)                    | 1                   | SNEKY <u>T</u> IVGTLEANPEEHK                                                                        |
| Heat shock protein GroEL<br>(MG392)                                | 13-27                             | 1718.86             | 1717.85                   | 1717.96                   | -0.11                           | 1 Phospho (ST)                   | 2                   | <u>I</u> RLLQGINKIANAVK                                                                             |
|                                                                    | 508-515                           | 969.5               | 968.5                     | 968.49                    | 0.00                            | 1 Phospho (ST)                   | 1                   | VTK <u>T</u> ALEK                                                                                   |
| DnaK-type molecular chaperone<br>(MG305)                           | 38-47                             | 1311.62             | 1310.61                   | 1310.57                   | 0.04                            | 1 Phospho (ST),<br>1 Phospho (Y) | 1                   | R <u>T</u> T <u>P</u> S <u>I</u> V <u>S</u> YK                                                      |
|                                                                    | 39-59                             | 2596.19             | 2595.18                   | 2595.08                   | 0.10                            | 1 Phospho (ST),<br>1 Phospho (Y) | 2                   | <u>T</u> <u>T</u> <u>P</u> <u>S</u> <u>I</u> <u>V</u> <u>S</u> <u>Y</u> KNNEIIVGDAAKR               |
| Cytadherence-accessory protein<br>(hmw3) homolog<br>(MG317)        | 39-57                             | 2283.18             | 2282.17                   | 2282.07                   | 0.10                            | 1 Phospho (Y)                    | 1                   | VHAL <u>Y</u> QDPESGNIFSLEKR                                                                        |
|                                                                    | 387-415                           | 3337.66             | 3336.65                   | 3336.69                   | -0.03                           | 3 Phospho (ST),<br>1 Phospho (Y) | 2                   | <u>T</u> E <u>Y</u> Q <u>P</u> Q <u>Q</u> PL <u>P</u> T <u>S</u> GLQIKVVPRSAALL <u>Q</u> <u>S</u> K |
| Pyruvate dehydrogenase<br>E1-alpha chain<br>(MG274)                | 259-282                           | 2843.34             | 2842.34                   | 2842.21                   | 0.12                            | 1 Phospho (Y)                    | 2                   | QGPHTTSD <u>D</u> PS <u>I</u> <u>Y</u> RTKQEEEEGMK                                                  |

|                                                                      |         |         |         |         |                             |                                  |                |                            |
|----------------------------------------------------------------------|---------|---------|---------|---------|-----------------------------|----------------------------------|----------------|----------------------------|
| Phosphopyruvate hydratase<br>-(enolase)<br>(MG407)                   | 35-60   | 2692.26 | 2691.25 | 2691.26 | -0.01                       | 1 Phospho (ST),                  | 1              | LASGHVGEAMVPSGASTGEKEAIELR |
|                                                                      | 423-439 | 2211.11 | 2210.10 | 2210.08 | 0.02                        | 2 Phospho (Y)                    | 2              | IAKYNRLLYIEIELGDK          |
| Translation elongation factor<br>EF-Tu<br>(MG451)                    | 167-177 | 1176.57 | 1175.56 | 1175.65 | -0.04                       | 2 Phospho (ST)                   | 0              | NTPIIYGSALK                |
|                                                                      | 286-304 | 2181.11 | 2180.10 | 2180.18 | -0.08                       | 1 Phospho (ST)                   | 2              | EVERGQVLAKPGSIKPHKK        |
| Restriction-modification enzyme<br>EcoD specificity chain<br>(MG438) | 27-49   | 2807.29 | 2806.28 | 2806.22 | 0.06                        | 2 Phospho(Y)                     | 2              | GEMLEKELITPEGKYEYFNGGVK    |
|                                                                      | 33-40   | 966.51  | 965.50  | 965.45  | 0.05                        | 1 Phospho (ST)                   | 0              | ELITPEGK                   |
|                                                                      | 57-80   | 2749.29 | 2748.29 | 2748.27 | 0.01                        | 1 Phospho (ST),<br>1 Phospho (Y) | 2              | FNIFKNTISVIVGGSCGYVRLADK   |
|                                                                      | 354-368 | 1875.90 | 1874.89 | 1874.95 | -0.06                       | 2 Phospho (ST)                   | 2              | ELSSLTIVIRDILLKK           |
|                                                                      | 363-376 | 1802.94 | 1801.93 | 1801.87 | 0.06                        | Oxid. (M),<br>1 Phospho(ST)      | 2              | DTLLKKLFPDMTER             |
| 363-376                                                              | 1882.89 | 1881.89 | 1881.83 | 0.05    | Oxid. (M),<br>2 Phospho(ST) | 2                                | DTLLKKLFPDMTER |                            |
| Pyruvate dehydrogenase<br>E1-beta chain<br>(MG273)                   | 158-177 | 2298.19 | 2297.19 | 2297.17 | 0.02                        | 1 Phospho (ST)                   | 1              | GLFLAAIESPDPVIFFEPPK       |
| Hypothetical protein<br>(MG377)                                      | 2-19    | 2299.18 | 2298.17 | 2298.08 | 0.09                        | 2 Phospho (ST),<br>1 Phospho (Y) | 2              | ATNLKSIKQLKPIQYDK          |
|                                                                      | 46-62   | 2207.11 | 2206.11 | 2205.95 | 0.16                        | 2 Phospho (ST),<br>1 Phospho (Y) | 1              | DAKESALYHELTHIVIK          |
|                                                                      | 105-116 | 1451.72 | 1450.71 | 1450.82 | -0.11                       | 1 Phospho (ST)                   | 2              | TIQSIAEKIIKK               |
|                                                                      | 126-138 | 1682.85 | 1681.84 | 1681.81 | 0.03                        | 1 Phospho (ST)                   | 2              | EWKVEVSDDIVKR              |
|                                                                      | 138-146 | 1330.66 | 1329.65 | 1329.58 | 0.07                        | 2 Phospho (Y)                    | 1              | RVISLYYEK                  |
|                                                                      | 153-165 | 1118.53 | 1117.53 | 1117.47 | 0.06                        | 1 Phospho (Y)                    | 1              | EYLDDKQK                   |
| Methionine sulfoxide reductase<br>A<br>(MG408)                       | 112-117 | 856.53  | 855.52  | 855.45  | 0.07                        | 1 Phospho<br>(STYHCD)            | 0              | FLKLQK                     |
| Conserved hypothetical protein<br>(MG427)                            | 110-132 | 2808.31 | 2807.30 | 2807.23 | 0.07                        | 2 Phospho (ST)                   | 2              | EFIDFVSKRCPAHNILLHGTSNFK   |

|                                  |         |         |         |         |       |                                  |   |                                                                                                                 |
|----------------------------------|---------|---------|---------|---------|-------|----------------------------------|---|-----------------------------------------------------------------------------------------------------------------|
| Hypothetical protein (MG342)     | 22-39   | 2239.13 | 2238.14 | 2238.12 | 0.02  | 1 Phospho (STYHCD)               | 2 | KFANELKH <u>S</u> L <u>S</u> CELIELK<br>(Cysteine treated with Iodoacetamide to form carbamidomethyl-cysteine). |
| ATP synthase alpha chain (MG401) | 14-21   | 1076.54 | 1075.53 | 1075.53 | 0.00  | 1 Phospho (Y)                    | 2 | TEIKKY <u>S</u> K                                                                                               |
|                                  | 23-40   | 1940.95 | 1939.94 | 1939.96 | 0.02  | 1 Phospho (ST)                   | 0 | IFN <u>S</u> EIGQVI <u>S</u> VADGIAK                                                                            |
|                                  | 141-164 | 2807.30 | 2806.30 | 2806.31 | -0.01 | 3 Phospho (ST)                   | 1 | <u>S</u> VNQPLE <u>T</u> GIL <u>T</u> IDALFPIGKGQR                                                              |
|                                  | 172-187 | 1794.83 | 1793.83 | 1793.93 | -0.10 | 1 Phospho (ST)                   | 1 | Q <u>T</u> GK <u>T</u> AI <u>A</u> ID <u>T</u> IINQK                                                            |
|                                  | 279-296 | 2261.11 | 2260.11 | 2260.00 | 0.11  | 1 Phospho (ST),<br>1 Phospho (Y) | 1 | RPPGREAFPGDV <u>F</u> <u>Y</u> L <u>H</u> <u>S</u> R                                                            |
| L-lactate dehydrogenase (MG460)  | 460-472 | 1598.85 | 1597.84 | 1597.71 | 0.13  | 1 Phospho (ST)                   | 0 | ITEEFNG <u>S</u> HPLFK                                                                                          |
|                                  | 6-25    | 2225.12 | 2224.12 | 2223.94 | 0.17  | 3 Phospho (ST)                   | 0 | IAIVG <u>S</u> GAVG <u>T</u> <u>S</u> FLYAAM <u>I</u> R                                                         |
| Ribosomal protein S2 (MG070)     | 3-25    | 2507.26 | 2506.25 | 2506.11 | 0.13  | 3 Phospho (ST)                   | 0 | GPKIAIVG <u>S</u> GAVG <u>T</u> <u>S</u> FLYAAM <u>I</u> R                                                      |
|                                  | 106-123 | 2233.09 | 2232.09 | 2232.00 | 0.08  | 3 Phospho (ST)                   | 1 | WLG <u>G</u> I <u>L</u> T <u>N</u> F <u>K</u> <u>T</u> L <u>S</u> I <u>S</u> IN <u>K</u>                        |
|                                  | 116-126 | 1310.70 | 1309.69 | 1309.70 | -0.01 | 1 Phospho(ST)                    | 1 | T <u>L</u> <u>S</u> I <u>S</u> IN <u>K</u> LN <u>K</u>                                                          |
|                                  | 124-140 | 2063.91 | 2062.90 | 2063.04 | -0.14 | 1 Phospho(ST)                    | 2 | LNKLVEQQQNAN <u>D</u> L <u>T</u> <u>K</u>                                                                       |
|                                  | 133-148 | 2017.06 | 2016.05 | 2015.94 | 0.11  | 2 Phospho (ST)                   | 2 | QNAN <u>D</u> L <u>T</u> <u>K</u> KENLL <u>L</u> <u>S</u> R                                                     |

1. Observed  $m/z$  is calculated as the experimental molecular mass (Da) plus the molecular mass (Da) of any additional protons, divided by the charge given by the protons.  $Mr(\text{expt})$  is the experimental molecular mass of the peptide (Da).  $Mr(\text{calc})$  is the calculated molecular mass of the peptide (Da). Delta mass is given by  $Mr(\text{expt}) - Mr(\text{calc})$  (Da).
2. Potentially phosphorylated peptides were predicted by a search using both Mascot and FindMod (details provided in the methods section, subhead: "MALDI-TOF-TOF MS and database searches"). For Mascot, the following variable modifications were searched: Oxidation (M), Phospho (ST) and Phospho (Y); and for "FindMod" search, the variable modifications searched were: Oxidation (M), Phospho (ST), Phospho(Y), Phospho(H), Phospho(C) and Phospho(D). The number listed for each entry shows how many phosphorylation sites were predicted for each peptide.
3. Potential phosphorylation sites underlined in the peptide sequence. The potential phosphopeptide of "methionine sulfoxide reductase A" was not localized by the prediction.

**Table B. Predicted phosphopeptides of *M. pneumoniae* based on MALDI-MS masses**

| Protein name<br>(Locus tag)                                         | Peptide<br>sequence<br>Start- End | Observed<br><i>m/z</i> <sup>1</sup> | <i>M<sub>r</sub></i> (expt) <sup>1</sup> | <i>M<sub>r</sub></i><br>(calc) <sup>1</sup> | Delta<br>mass<br>(Da) <sup>1</sup> | Modification <sup>2</sup>                      | Missed<br>cleavages | Phosphopeptides sequence <sup>3</sup>                                   |
|---------------------------------------------------------------------|-----------------------------------|-------------------------------------|------------------------------------------|---------------------------------------------|------------------------------------|------------------------------------------------|---------------------|-------------------------------------------------------------------------|
| Putative structural protein<br>involved in cytoskeleton<br>(MPN474) | 537-545                           | 1312.60                             | 1311.59                                  | 1311.49                                     | 0.10                               | 1 Phospho (ST),<br>1 Phospho (Y)               | 1                   | LNDENT <u>K</u> YR                                                      |
|                                                                     | 550-561                           | 1602.72                             | 1601.71                                  | 1601.58                                     | 0.13                               | Oxid. (M),<br>1 Phospho (ST),<br>1 Phospho (Y) | 1                   | QYELMRAD <u>S</u> DAK                                                   |
| Cytadherence accessory<br>protein HMW3<br>(MPN452)                  | 652-670                           | 2239.14                             | 2238.13                                  | 2238.14                                     | -0.01                              | 1 Phospho (ST)                                 | 3                   | <u>S</u> PLRGGL <u>S</u> QRFP <u>L</u> R <u>S</u> <u>S</u> W <u>S</u> K |
| Probable DNA-directed RNA<br>polymerase delta subunit<br>(MPN024)   | 14-21                             | 1045.53                             | 1044.53                                  | 1044.45                                     | 0.07                               | 1 Phospho (ST)                                 | 0                   | EIAE <u>I</u> QFK                                                       |
| Trigger factor tig<br>(MPN331)                                      | 3-14                              | 1559.81                             | 1558.80                                  | 1558.78                                     | 0.03                               | 1 Phospho (Y)                                  | 2                   | QY <u>K</u> LVNTTQKEK                                                   |
| Phosphopyruvate hydratase<br>- (enolase)<br>(MPN606)                | 1-11                              | 1278.56                             | 1277.55                                  | 1277.54                                     | 0.01                               | 1 Phospho (ST)                                 | 0                   | M <u>S</u> AQTGTDLFK                                                    |
| Translation elongation factor<br>EF-Tu<br>(MPN665)                  | 39-52                             | 1661.79                             | 1660.78                                  | 1660.75                                     | 0.04                               | 1 Phospho (Y)                                  | 2                   | EGKSAAT <u>R</u> YDQIDK                                                 |
|                                                                     | 58-74                             | 2087.95                             | 2086.94                                  | 2086.82                                     | 0.12                               | 2 Phospho (ST),<br>1 Phospho (Y)               | 1                   | ARG <u>I</u> T <u>I</u> NS <u>A</u> HVEY <u>S</u> SDK                   |
|                                                                     | 58-75                             | 2083.97                             | 2082.96                                  | 2082.98                                     | -0.02                              | 1 Phospho (Y)                                  | 2                   | ARGITINSAHVEY <u>S</u> SDKR                                             |
| Pyruvate dehydrogenase<br>E1-beta chain<br>(MPN392)                 | 290-306                           | 1929.04                             | 1928.03                                  | 1928.00                                     | 0.03                               | 1 Phospho (ST)                                 | 1                   | AAPQRVT <u>G</u> WDIVVPLAR                                              |
| Hypothetical protein<br>H10_orf220L<br>(MPN295)                     | 168-175                           | 1126.53                             | 1125.52                                  | 1125.59                                     | -0.08                              | 1 Phospho (Y)                                  | 1                   | K <u>L</u> Y <u>L</u> RPEK                                              |
|                                                                     | 118-124                           | 941.55                              | 940.55                                   | 940.42                                      | 0.13                               | 1 Phospho (ST)                                 | 1                   | Q <u>S</u> W <u>K</u> NAK                                               |

|                                                                             |         |         |         |         |       |                                |   |                                  |
|-----------------------------------------------------------------------------|---------|---------|---------|---------|-------|--------------------------------|---|----------------------------------|
| Ribosomal protein S2<br>(MPN208)                                            | 148-154 | 942.46  | 941.45  | 941.40  | 0.05  | 1 Phospho (ST)                 | 0 | ENLML <u>S</u> R                 |
| MG427 homolog<br>(Osmotical inducible protein<br>C like family)<br>(MPN625) | 65-79   | 1802.91 | 1801.91 | 1801.88 | 0.02  | 2 Oxid. (M),<br>1 Phospho (ST) | 1 | MI <u>I</u> NKLLMNVTG <u>S</u> R |
| L-lactate dehydrogenase<br>(MPN674)                                         | 190-200 | 1290.64 | 1289.63 | 1289.69 | -0.06 | 1 Phospho (ST)                 | 1 | IAGLPLKH <u>F</u> S <u>K</u>     |

---

1. Observed  $m/z$  is calculated as the experimental molecular mass (Da) plus the molecular mass (Da) of any additional protons, divided by the charge given by the protons.  $Mr(\text{expt})$  is the experimental molecular mass of the peptide (Da).  $Mr(\text{calc})$  is the calculated molecular mass of the peptide (Da). Delta mass is given by  $Mr(\text{expt}) - Mr(\text{calc})$  (Da).
2. Potentially phosphorylated peptides were predicted by a search using both Mascot and FindMod (details provided in the methods section, subhead: "MALDI-TOF-TOF MS and database searches"). For Mascot, the following variable modifications were searched: Oxidation (M), Phospho (ST) and Phospho (Y); and for "FindMod" search, the variable modifications searched were: Oxidation (M), Phospho (ST), Phospho(Y), Phospho(H), Phospho(C) and Phospho(D). The number listed for each entry shows how many phosphorylation sites were predicted for each peptide.
3. Potential phosphorylation sites underlined in the peptide sequence.
